# Supplementary material
Source: PubMed Central journal article supplement (PMC4382029)
Supplement: supp_3.1.E62_2014-0024-1-at.pdf [file supp_3.1.E62_2014-0024-1-at.pdf]

## Appendix 1 (as supplied by author): Survey for participants

### PATIENT QUESTIONNAIRE

IN THIS STUDY, WE AIM TO DETERMINE THE ACCEPTANCE OF SCREENING FOR HEPATITIS C AMONG PATIENTS UNDERGOING SCREENING FOR COLON CANCER. THE QUESTIONNAIRE INCLUDES QUESTIONS REGARDING YOUR DEMOGRAPHIC FACTORS, RISK FACTORS FOR HEPATITIS C VIRUS INFECTION, AND YOUR WILLINGNESS TO BE TESTED FOR HEPATITIS C AND EVALUATED BY A SPECIALIST IF FOUND TO BE INFECTED. THESE QUESTIONS WILL ASSIST US TO DETERMINE IF THERE ARE ANY FACTORS THAT AFFECT YOUR LIKELIHOOD OF ACCEPTING HEPATITIS C SCREENING.

COMPLETION OF THIS QUESTIONNAIRE IS ENTIRELY VOLUNTARY. ANY RESPONSES TO THIS QUESTIONNAIRE WILL REMAIN ANONYMOUS (NOT LINKED TO YOU INDIVIDUALLY) AND YOUR IDENTITY AND RESPONSES WILL NOT BE DISCLOSED TO ANYONE.

1. Date questionnaire completed:

|                      |                      |   |                      |                      |   |                      |                      |                      |                      |
|----------------------|----------------------|---|----------------------|----------------------|---|----------------------|----------------------|----------------------|----------------------|
| <input type="text"/> | <input type="text"/> | / | <input type="text"/> | <input type="text"/> | / | <input type="text"/> | <input type="text"/> | <input type="text"/> | <input type="text"/> |
| dd                   |                      |   | mm                   |                      |   | yyyy                 |                      |                      |                      |

2. Age:

|                      |                      |       |
|----------------------|----------------------|-------|
| <input type="text"/> | <input type="text"/> | Years |
|----------------------|----------------------|-------|

3. Gender:

|                               |                                 |
|-------------------------------|---------------------------------|
| <input type="checkbox"/> MALE | <input type="checkbox"/> FEMALE |
|-------------------------------|---------------------------------|

4. Were you born in Canada?

|                              |                             |
|------------------------------|-----------------------------|
| <input type="checkbox"/> YES | <input type="checkbox"/> NO |
|------------------------------|-----------------------------|

If NO: In what country were you born? \_\_\_\_\_

How long have you lived in Canada?

|                                             |
|---------------------------------------------|
| <input type="checkbox"/> Less than 5 years  |
| <input type="checkbox"/> 5 to 10 years      |
| <input type="checkbox"/> More than 10 years |

5. Race:

|                                                               |
|---------------------------------------------------------------|
| <input type="checkbox"/> Caucasian                            |
| <input type="checkbox"/> Black                                |
| <input type="checkbox"/> Asian (e.g. Chinese, Japanese)       |
| <input type="checkbox"/> South Asian (e.g. Indian, Pakistani) |
| <input type="checkbox"/> Aboriginal                           |
| <input type="checkbox"/> Other (Please specify): _____        |

EID 24940, PI Dr. Rob Myers. Questionnaire V1

Feasibility and Yield of Birth-Cohort Screening for Hepatitis C Antibody in a Canadian Colorectal Cancer Screening Population

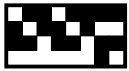

Draft

6. Did you graduate from high school?

YES  NO

If NO: What is the highest grade you completed? Grade

7. Please indicate any additional training you have completed?

- None
- College diploma
- Trade certificate
- University degree (e.g. Bachelor's, Masters, PhD)

8. Marital status:

- Married
- Living common-law or with partner
- Divorced
- Separated
- Widowed
- Single (never married)

9. Employment:

- Working full-time (30 hours per week or more)
- Working part-time (less than 30 hours per week)
- Not employed, but looking for work
- On leave/disability
- Homemaker
- Retired
- Student
- Other (Please specify): \_\_\_\_\_

10. Have you ever been tested for hepatitis C?

- YES
- NO
- UNSURE

11. Have you ever been diagnosed with hepatitis C?

- YES
- NO
- UNSURE

EID 24940, PI Dr. Rob Myers. Questionnaire V1  
 Feasibility and Yield of Birth-Cohort Screening for Hepatitis C Antibody in a Canadian Colorectal  
 Cancer Screening Population

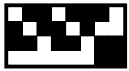

Draft

12. Have you ever (even once) used injection drugs (e.g. heroin)?  YES  
 NO
13. Have you ever received a blood transfusion or blood products (e.g. plasma) before 1992?  YES  
 NO  
 UNSURE
14. Have you ever received an organ transplant before 1992?  YES  
 NO  
 UNSURE
15. Have you ever been in prison?  YES  
 NO
16. Have you ever had a tattoo?  YES  
 NO
17. Have you ever had sexual contact with someone known to have hepatitis C?  YES  
 NO
18. Does your spouse/partner have hepatitis C?  YES  
 NO  
 UNSURE
19. Do any of your family members(Parents, Children or Siblings) have hepatitis C?  YES  
 NO  
 UNSURE
20. Would you consent to a BLOOD test for hepatitis C?  YES  
 NO
21. Would you consent to a SALIVA test for hepatitis C?  YES  
 NO
22. If you were diagnosed with hepatitis C, would you consent to evaluation by a liver specialist?  YES  
 NO

EID 24940, PI Dr. Rob Myers. Questionnaire V1  
Feasibility and Yield of Birth-Cohort Screening for Hepatitis C Antibody in a Canadian Colorectal Cancer Screening Population

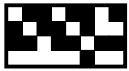

Draft

**THANK YOU FOR COMPLETING THIS QUESTIONNAIRE.**

**IF YOU WOULD LIKE TO KNOW ANYTHING MORE ABOUT THIS QUESTIONNAIRE OR THE STUDY THAT WE ARE CONDUCTING, OR HAVE ANY CONCERNS OR COMPLAINTS REGARDING THIS STUDY, YOU CAN CONTACT THE PRINCIPAL INVESTIGATOR, DR. ROBERT MYERS, AT 403-592-5049.**

**IF YOU HAVE ANY QUESTIONS CONCERNING YOUR RIGHTS AS A POSSIBLE PARTICIPANT IN THIS RESEARCH, PLEASE CONTACT: CHAIR OF THE CONJOINT HEALTH RESEARCH ETHICS BOARD, UNIVERSITY OF CALGARY, AT 403-220-7990.**

EID 24940, PI Dr. Rob Myers. Questionnaire V1  
Feasibility and Yield of Birth-Cohort Screening for Hepatitis C Antibody in a Canadian Colorectal Cancer Screening Population

Appendix to: Myers RP, Crotty P, Town S, English J, Fonseca K, Tellier R, Swain MG, McGregor E, Heitman SJ, Hilsden RJ. Acceptability and yield of birth-cohort screening for hepatitis C virus in Canadian population being screened for colorectal cancer: a cross-sectional study. *CMAJ Open* 2015. DOI:10.1503/cmajo20140024. Copyright © 2015 8872147 Canada Inc. or its licensors
