# Supplementary material
Source: PubMed Central journal article supplement (PMC4382029)
Supplement: supp_3.1.E62_Original_submission.pdf [file supp_3.1.E62_Original_submission.pdf]

1  
2  
3  
4  
5  
6  
7  
8  
9  
10  
11  
12  
13  
14  
15  
16  
17  
18  
19  
20  
21  
22  
23  
24  
25  
26  
27  
28  
29  
30  
31  
32  
33  
34  
35  
36  
37  
38  
39  
40  
41  
42  
43  
44  
45  
46  
47  
48  
49  
50  
51  
52  
53  
54  
55  
56  
57  
58  
59  
60

## ACCEPTABILITY AND YIELD OF BIRTH COHORT SCREENING FOR HEPATITIS C IN A CANADIAN COLORECTAL CANCER SCREENING POPULATION

Robert P. Myers, MD, MSc,<sup>1,2</sup> Pam Crotty, MSc,<sup>1</sup> Susanna Town, PhD,<sup>3</sup> Janine English,<sup>3</sup> Kevin Fonseca, PhD,<sup>4</sup> Raymond Tellier, MD, MSc,<sup>4</sup> Mark G. Swain, MD, MSc,<sup>1</sup> S. Elizabeth McGregor, PhD,<sup>3</sup> Steven J. Heitman, MD, MSc,<sup>3</sup> Robert J. Hilsden, MD, PhD<sup>2,3</sup>

<sup>1</sup> Liver Unit, Division of Gastroenterology and Hepatology, Department of Medicine, University of Calgary, Calgary, Alberta, Canada

<sup>2</sup> Department of Community Health Sciences, University of Calgary, Calgary, Alberta, Canada

<sup>3</sup> Forzani & MacPhail Colon Cancer Screening Centre, Alberta Health Services, Calgary, Alberta, Canada

<sup>4</sup> Provincial Laboratory for Public Health, Calgary, Alberta, Canada

*Short title:* Hepatitis C and colorectal cancer screening

*Correspondence:*

Dr. Robert P. Myers

Liver Unit, University of Calgary

6D22, Teaching, Research and Wellness Building

3280 Hospital Drive N.W.

Calgary, AB, Canada T2N 4Z6

Tel: (403) 592-5049 Fax: (403) 592-5090

email: [rpmyers@ucalgary.ca](mailto:rpmyers@ucalgary.ca)

## ABSTRACT

**Background:** Hepatitis C virus (HCV) screening is recommended in patients born between 1945 and 1965 ('baby boomers'). Since these individuals are often screened for colorectal cancer (CRC), dual screening for HCV may enhance case identification. Our objectives were to assess the acceptability and yield of HCV screening among patients undergoing CRC screening.

**Methods:** Patients referred for CRC screening colonoscopy completed an anonymous survey regarding the acceptability of HCV screening, risk factors, and prior testing. The impact of demographics and HCV risk factors on screen willingness were determined using logistic regression, and stored serum on 483 patients who had undergone CRC screening were tested for HCV antibodies.

**Results:** Among 1,012 survey respondents (median age 56 years, 90% baby boomers, 87% Caucasian, 22% immigrants), 123 patients (12%) reported prior HCV testing. Nine of these patients (0.9%; 1.0% of baby boomers) were previously diagnosed with HCV, of whom 5 (56%) reported risk factors. Excluding these patients, 90% would consent to blood or salivary HCV testing. After adjustment for age, gender, and immigrant status, Caucasians (odds ratio [OR] 3.38; 95% CI 1.81-6.32) and patients with risk factors (>1 vs. 0: OR 3.67; 1.12-12.02) had higher screening acceptance. Among 483 patients screened for CRC, three were anti-HCV positive (0.6% [95% CI 0.1-1.8%]; 0.8% [0.2-2.4%]) of baby boomers).

**Interpretation:** Acceptance of HCV screening is high among Canadians undergoing CRC screening. However, the relatively low HCV prevalence suggests that the cost-effectiveness of birth cohort screening in this population warrants evaluation.

## INTRODUCTION

Chronic hepatitis C virus (HCV) infection is a leading cause of cirrhosis, hepatocellular carcinoma, and liver transplantation in Canada [1]. These complications are expected to increase dramatically over the next decade [2] and cause more years of life lost due to mortality and suboptimal health compared with any other infectious disease [3]. Canadian guidelines advocate HCV testing in individuals with evidence of liver disease or risk factors including injection drug use (IDU), receipt of blood products before 1992, and immigrants from endemic countries [4]. However, several characteristics of HCV suggest that more widespread screening may be beneficial. First, HCV infection is common. Although the exact prevalence is unknown, at least 250,000 Canadians (0.8% of the population) are likely infected [2]. Second, most patients are asymptomatic until advanced liver disease has developed; thus, many HCV cases are unaware of their infection (60% to 70% in Canada and the U.S.) [5, 6]. Third, therapies are available that cure the virus in 70-80% of patients [4], arrest progression of liver disease, and reduce mortality [7]. Based on these characteristics, recent U.S. guidelines advocated one time screening for HCV antibodies in individuals born between 1945 and 1965 ('baby boomers'), plus risk factor-based screening [8]. This birth cohort has a high prevalence of HCV (3.6% in the U.S.), accounts for 75% of cases, and has the greatest risk of HCV-related mortality [9, 10]. The Canadian Liver Foundation has endorsed similar recommendations [11].

Prior to adopting birth-cohort screening in Canada, the prevalence of HCV and the feasibility of this approach require confirmation. Our study sought to address these issues among patients undergoing colonoscopy for colorectal cancer (CRC) screening. This unique clinical setting

1  
2  
3 offers several advantages relevant to birth-cohort HCV screening. Since CRC screening is  
4 recommended for individuals starting at age 50 – many of whom undergo colonoscopy at  
5 regular intervals - this patient population is enriched with baby boomers [12]. Second, patients  
6 who undergo CRC screening are engaged in care and have demonstrated acceptance of  
7 preventive interventions. Finally, gastroenterologists are in a distinctive position as they are  
8 both experts on viral hepatitis and perform screening colonoscopies. Unlike primary care-  
9 based HCV screening, this environment ensures direct linkage to counseling and antiviral  
10 therapy for infected cases.  
11  
12  
13  
14  
15  
16  
17  
18  
19  
20  
21  
22  
23  
24  
25  
26

## 27 **METHODS**

### 28 **Study Setting**

29  
30  
31 The Forzani and MacPhail Colon Cancer Screening Centre (CCSC) is a non-hospital  
32 endoscopy unit located in Calgary, Alberta that is dedicated to providing CRC screening-  
33 related colonoscopies (~19,000 annually) to residents of Calgary and surrounding communities  
34 (population ~1.5 million) [13]. The CCSC accepts referrals for asymptomatic, generally healthy  
35 individuals eligible for CRC screening-related colonoscopy, including those at average or  
36 increased risk of CRC, for investigation of positive fecal occult blood tests, and surveillance for  
37 those with a history of adenomatous polyps or CRC. Colonoscopy for the investigation of  
38 symptoms, dysplasia surveillance in patients with inflammatory bowel disease, or for patients  
39 with major comorbidities that preclude colonoscopy in a non-hospital setting (e.g.  
40 decompensated cirrhosis) is not provided.  
41  
42  
43  
44  
45  
46  
47  
48  
49  
50  
51  
52  
53  
54  
55  
56  
57  
58  
59  
60

1  
2  
3 Prior to colonoscopy at the CCSC, referred patients attend an education session regarding  
4 CRC, including screening options and colonoscopy preparation [13]. For the first part of this  
5 study, we invited all individuals presenting for this session during May 2013 to complete an  
6 anonymous questionnaire that included demographic information and questions regarding the  
7 acceptability of HCV screening by blood and/or saliva-based assays, risk factors for infection  
8 (e.g. IDU, blood transfusion, etc.), and previous testing for and pre-existing diagnoses of HCV  
9 (see Appendix for the questionnaire). Pre-existing HCV diagnoses could not be confirmed due  
10 to the anonymous nature of the survey. Patients were also asked about their willingness to be  
11 evaluated by a liver specialist if found to be HCV-positive.  
12  
13  
14  
15  
16  
17  
18  
19  
20  
21  
22  
23  
24  
25  
26

27 The CCSC also maintains a bio-repository that includes demographic, lifestyle and health  
28 information (excluding HCV status), plus serum specimens (stored at -80 °C) on consenting  
29 individuals who have undergone colonoscopy for CRC screening. Patients within the bio-  
30 repository are similar to the general population of screened patients. For the second part of the  
31 study, we randomly selected 496 individuals who had provided serum specimens to the bio-  
32 repository between February 2011 and August 2012. As these patients had not specifically  
33 consented to HCV testing, we contacted them by mail to outline the purpose of the study and  
34 request permission to test their serum for HCV. Patients wishing to opt out were asked to  
35 return a pre-addressed letter within one month of the initial mailing. In total, 8 subjects declined  
36 participation and the invitation letter from five subjects was returned undeliverable. Therefore,  
37 13 subjects were excluded leaving 483 specimens (97%) available for testing. In these  
38 patients, testing for anti-HCV antibodies was performed using the Architect anti-HCV CMIA  
39 assay (Abbott Laboratories; Abbott Park, IL) with confirmation by the MONOLISA Anti-HCV  
40  
41  
42  
43  
44  
45  
46  
47  
48  
49  
50  
51  
52  
53  
54  
55  
56  
57  
58  
59  
60

1  
2  
3 Plus assay (Bio-Rad Laboratories; Montreal, PQ). In patients who were anti-HCV positive on  
4  
5 both assays, chronic HCV infection (i.e. persistent viremia) was confirmed by testing the serum  
6  
7 for HCV RNA using the Abbott RealTime HCV Version 4.0 assay (lower limit of virus detection,  
8  
9 12 IU/mL).  
10  
11

## 12 13 14 15 **Statistical Analyses**

16  
17 Data are presented as medians (interquartile range [IQR]) or proportions. Between groups  
18  
19 comparisons were made using Fisher's exact or Mann-Whitney tests. In the first part of the  
20  
21 study, the primary outcome measure was the willingness to be screened for anti-HCV  
22  
23 antibodies by either blood or saliva-based assays. Using logistic regression analysis, we  
24  
25 determined the associations between the following factors and screen willingness: age, sex,  
26  
27 race (Caucasian vs. other), immigrant status (Canadian vs. foreign-born), marital status  
28  
29 (married/common-law vs. other), education (university vs. lower), and the number of self-  
30  
31 reported risk factors for HCV including IDU, blood transfusion, tattoos, incarceration, infected  
32  
33 family member or spouse, and sexual contact with an HCV-positive partner (categorized as 0,  
34  
35 1, and  $\geq 2$  risk factors). Independent predictors of willingness to be screened were determined  
36  
37 using a logistic regression model including age, gender, and variables significant ( $P < 0.05$ ) in  
38  
39 univariate analyses. Associations are presented with odds ratios (OR) and 95% confidence  
40  
41 intervals (CI). In the second part of the study, the proportions of individuals with positive anti-  
42  
43 HCV antibodies and positive serum HCV RNA were calculated with exact binomial 95% CIs.  
44  
45 Subgroup analyses were conducted according to birth cohort (1945-1965 [baby boomers] vs.  
46  
47 other). All statistical analyses were performed using Stata v11.0 (StataCorp; College Station,  
48  
49 TX). Two-sided  $P$ -values less than 0.05 were considered statistically significant.  
50  
51  
52  
53  
54  
55  
56  
57  
58  
59  
60

## RESULTS

### Patient Characteristics

During May 2013, 1,012 individuals referred for CRC screening colonoscopy at the CCSC completed the questionnaire regarding HCV screening. Fifty-two percent of respondents were male and the median age was 56 years (IQR 53-62); 90% were baby boomers. The majority (87%) was Caucasian, 22% were immigrants, and 42% had a university degree. Twenty-six percent of respondents (n=266) reported at least one risk factor for HCV infection. With the exception of prior blood transfusions (9%) and tattoos (9%), risk factors were uncommon (IDU [2.2%], infected family member [1.5%] or spouse [0.2%], incarceration [0.7%], and sexual contact with an infected partner [0.5%]).

### Self-Reported HCV Infection

Among 123 survey respondents (12%) reporting previous HCV testing, 9 patients (7.3%) disclosed a known diagnosis of HCV. If confirmed (and the remaining patients tested negative), these infections would correspond to an HCV prevalence of 0.9% (95% CI 0.4-1.7% [9/1,012]) overall and 1.0% (95% CI 0.5-1.9% [9/914]) among baby boomers. Five of these patients (56%) reported HCV risk factors, including IDU in four patients, and an infected family member/blood transfusion in one patient.

### Acceptability of HCV Screening

Excluding the 9 patients with self-reported HCV infection, 90% of survey respondents (903/1,003) would consent to HCV antibody screening by blood (85%) or saliva-based testing (89%;  $P=0.009$  vs. blood). Ninety-two percent of individuals (919/1,003) would consent to

1  
2  
3 evaluation by a specialist if found to be HCV-positive. Table 1 outlines the characteristics of  
4 patients referred for CRC screening according to their willingness to undergo HCV screening.  
5  
6 In univariate analysis, Caucasian race, non-immigrant status, and an increasing number of  
7  
8 HCV risk factors were associated with a willingness to be screened. After adjustment for age  
9  
10 and gender, Caucasians were more likely to accept HCV screening (OR 3.38; 95% CI 1.81-  
11  
12 6.32); immigrant status was not significant (OR 0.70; 95% CI 0.39-1.26). Compared to patients  
13  
14 with no reported HCV risk factors, patients with one (OR 2.79; 95% CI 1.30-5.96) or at least  
15  
16 two risk factors (OR 3.67; 95% CI 1.12-12.02) were more likely to accept HCV screening.  
17  
18  
19  
20  
21  
22  
23

### 24 **Prevalence of HCV in Patients Screened for Colorectal Cancer**

25  
26 Serum samples from 483 patients who had undergone CRC screening colonoscopy were  
27  
28 tested for anti-HCV antibodies. The median age was 56 years (IQR 56-61), 77% (n=370) were  
29  
30 baby boomers, 48% were male, 26% were immigrants, and 43% had a university education. In  
31  
32 total, four patients were anti-HCV-positive on initial screening, of which three were confirmed,  
33  
34 corresponding to an anti-HCV prevalence of 0.6% (95% CI 0.1-1.8% [3/483]) overall and 0.8%  
35  
36 (95% CI 0.2-2.4% [3/370]) among baby boomers. The three anti-HCV positive patients were  
37  
38 male, baby boomers, and one was foreign-born. HCV RNA was positive in two of these cases  
39  
40 (52,971 IU/mL and 9,728,627 IU/mL, respectively), corresponding to a prevalence of chronic  
41  
42 HCV infection (i.e. viremia) of 0.4% (95% CI 0.05-1.5%) overall and 0.5% (0.07-2.0%) among  
43  
44 baby boomers.  
45  
46  
47  
48  
49  
50  
51  
52  
53  
54  
55  
56  
57  
58  
59  
60



## INTERPRETATION

### Main Findings

Our study confirms that acceptability of HCV screening is high among Canadian patients undergoing colonoscopy for CRC screening. However, the prevalence of HCV was lower than expected, suggesting that birth-cohort screening in this patient population may not be the optimal means of improving case identification globally in Canada. On the other hand, these individuals are engaged in preventive care and would potentially be more likely to accept and complete anti-HCV therapy than other target screening populations.

Among patients referred for CRC screening colonoscopy at a non-hospital endoscopy facility, 90% would be willing to undergo dual screening for HCV by either blood or saliva-based assays. Patients with risk factors for HCV were more likely to accept screening, suggesting that risk factor-based screening could be effective if appropriately conducted. However, frequently cited barriers to this approach including lack of physician time and knowledge about HCV risk factors, as well as patient reluctance to disclose risk factors were at least partially addressed by our administration of an anonymous survey [14]. We also observed that immigrant patients were less likely to accept screening, although this difference did not persist after adjustment for race; Caucasians were more accepting of screening. Other studies have demonstrated reduced screening of immigrants (e.g. for breast and cervical cancer) [15, 16], perhaps due to fear of stigmatization or repercussions regarding immigration status [17]. Not surprisingly, patients were more likely to accept HCV screening via salivary tests – not yet available in Canada - compared with blood tests, presumably due to their non-invasive nature [18]. Although this issue is less important in this setting since patients could have blood drawn

1  
2  
3 with insertion of their intravenous line pre-colonoscopy, the use of salivary tests when available  
4  
5 may be preferable in other settings such as outreach programs, particularly among injection  
6  
7 drug users who may have compromised venous access [19].  
8  
9

10  
11  
12 The observed rates of self-reported HCV infection (0.9% overall and 1.0% of baby boomers)  
13  
14 and anti-HCV positivity of screened blood samples (0.6% overall and 0.8% of baby boomers)  
15  
16 are lower than we expected, particularly if one considers only chronically infected (i.e. viremic)  
17  
18 patients (0.4% overall and 0.5% of baby boomers). In British Columbia, 1.4% of HCV antibody  
19  
20 tests were positive (3.0% of baby boomers) [20] and U.S. estimates of HCV prevalence from  
21  
22 the National Health and Nutrition Examination Survey are significantly higher (1.6% overall and  
23  
24 3.6% of baby boomers) [9]. There are several potential explanations for these differences.  
25  
26 Importantly, the prevalence of HCV in Canada may be lower than some have suggested. Our  
27  
28 results are in keeping with modeled estimates from Remis (0.8% overall and 1.2% of baby  
29  
30 boomers) [2]. Moreover, in the only seroprevalence study of randomly-selected individuals in  
31  
32 Canada, the Canadian Health Measures Survey (CHMS) reported an anti-HCV prevalence of  
33  
34 0.5% overall and 0.8% among individuals aged 50-79 years [6]. However, our study and the  
35  
36 CHMS under-sampled some high-risk groups including injection drug users, incarcerated  
37  
38 individuals, the homeless, and Aboriginals. Although the immigrant population in our study  
39  
40 (and in the CHMS) [6] was similar to the Canadian population, ours was a highly educated  
41  
42 cohort engaged in their health care. Therefore, the generalizability of our findings may be  
43  
44 questioned. Moreover, due to the relatively small sample size of our study, the confidence  
45  
46 intervals surrounding our prevalence estimates are wide. For example, the HCV prevalence in  
47  
48 baby boomers and overall could be as high as 2.4% and 1.8%, respectively. Despite these  
49  
50  
51  
52  
53  
54  
55  
56  
57  
58  
59  
60

1  
2  
3 uncertainties, the main unanswered question is whether HCV screening among patients  
4  
5 undergoing CRC screening (and in general) is cost-effective. In the U.S., primary care-based  
6  
7 baby boomer screening has been advocated based on an incremental cost-effectiveness ratio  
8  
9 of approximately \$36,000 versus risk factor-based screening [5]. Whether combined screening  
10  
11 for HCV and CRC is cost-effective in Canada warrants formal analysis, particularly in light of  
12  
13 differences in HCV prevalence and the costs of HCV screening and treatment in Canada  
14  
15 versus the U.S. Similar to advanced CRC, the costs of managing end-stage liver disease  
16  
17 secondary to HCV is high. Moreover, the fact that patients undergoing CRC screening are  
18  
19 already engaged in care with HCV treatment experts, thus reducing the necessity of additional  
20  
21 referral and appointments, must be considered.  
22  
23  
24  
25  
26  
27  
28

### 29 **Limitations**

30  
31 As mentioned, the ability to draw inferences regarding the prevalence of HCV in Canada is  
32  
33 limited by the small sample size and specific nature of our study population. In addition, 8  
34  
35 patients (1.6%) declined study participation and five could not be contacted. If these patients  
36  
37 declined due to known hepatitis C or perceived risks factors for infection, our prevalence  
38  
39 figures could be underestimates.  
40  
41  
42  
43  
44

### 45 **Conclusions**

46  
47 In summary, acceptance of HCV screening is high among Canadian patients undergoing CRC  
48  
49 screening. However, the relatively low HCV prevalence suggests that the cost-effectiveness of  
50  
51 birth cohort screening in this population warrants evaluation prior to the widespread adoption  
52  
53 of this approach.  
54  
55  
56  
57  
58  
59  
60

## CONTRIBUTORS

Robert Myers, Pam Crotty, Susanna Town, Mark Swain, Steven Heitman, and Robert Hilsden helped conceive and design the study and interpreted the data. Robert Myers, Pam Crotty, Susanna Town, Janine English, Kevin Fonseca, Raymond Tellier, S. Elizabeth McGregor, Steven Heitman, and Robert Hilsden acquired the data. Robert Myers analyzed the data and drafted the manuscript. All of the authors critically revised the manuscript for important intellectual content and approved the final version submitted for publication.

## FUNDING

This study was supported by a grant from Vertex Pharmaceuticals Canada. The study sponsor had no role in the design or conduct of the study, interpretation of the data, drafting of the manuscript, or decision to submit the manuscript for publication. Dr. Myers was supported by an award from the Canadian Institutes for Health Research (CIHR) and Dr. Hilsden by Alberta-Innovates – Health Solutions. Dr. Swain is supported by the Cal Wenzel Family Foundation Chair in Hepatology.

## COMPETING INTERESTS

Robert Myers and Mark Swain have received consultation, research, and/or speaking fees from Vertex, Merck, Roche, Gilead, Janssen, Abbvie, and Boehringer-Ingelheim, all of whom produce products for the treatment of HCV. No competing interests were declared by the other authors.

## REFERENCES

1. Myers RP, Liu M, Shaheen AA. The burden of hepatitis C virus infection is growing: a Canadian population-based study of hospitalizations from 1994 to 2004. *Can J Gastroenterol*. 2008 Apr;22(4):381-7.
2. Remis, R.S. Modelling the incidence and prevalence of hepatitis C infection and its sequelae in Canada, 2007. Final Report. <http://www.phac-aspc.gc.ca/sti-its-surv-epi/model/pdf/model07-eng.pdf> (Accessed 1/2/2012).
3. Kwong JC, Crowcroft NS, Campitelli MA, Ratnasingham S, Daneman N, Deeks SL, Manuel DG. Ontario Burden of Infectious Disease Study Advisory Group; Ontario Burden of Infectious Disease Study (ONBOIDS): An OAHPP/ICES Report. Toronto: Ontario Agency for Health Protection and Promotion, Institute for Clinical Evaluative Sciences; 2010.
4. Myers RP, Ramji A, Bilodeau M, Wong S, Feld JJ. An update on the management of hepatitis C: Consensus guidelines from the Canadian Association for the Study of the Liver. *Can J Gastroenterol*. 2012 Jun;26(6):359-75.
5. Rein DB, Smith BD, Wittenborn JS, Lesesne SB, Wagner LD, Roblin DW, et al. The cost-effectiveness of birth-cohort screening for hepatitis C antibody in U.S. primary care settings. *Ann Intern Med*. 2012 Feb 21;156(4):263-70.
6. Rotermann M, Langlois K, Andonov A, Trubnikov M. Seroprevalence of hepatitis B and C virus infections: Results from the 2007 to 2009 and 2009 to 2011 Canadian Health Measures Survey. Statistics Canada. Catalogue no. 82-003-X. Health Reports 2013.
7. van der Meer AJ, Veldt BJ, Feld JJ, Wedemeyer H, Dufour JF, Lammert F, et al. Association between sustained virological response and all-cause mortality among patients with chronic hepatitis C and advanced hepatic fibrosis. *JAMA*. 2012 Dec 26;308(24):2584-93.
8. U.S. Preventive Services Task Force. Screening for hepatitis C virus infection in adults: Final recommendation statement. 2013. Report No.: 12-05174-EF-2.
9. Armstrong GL, Wasley A, Simard EP, McQuillan GM, Kuhnert WL, Alter MJ. The prevalence of hepatitis C virus infection in the United States, 1999 through 2002. *Ann Intern Med*. 2006 May 16;144(10):705-14.
10. Ly KN, Xing J, Klevens RM, Jiles RB, Ward JW, Holmberg SD. The increasing burden of mortality from viral hepatitis in the United States between 1999 and 2007. *Ann Intern Med*. 2012 Feb 21;156(4):271-8.
11. Canadian Liver Foundation. National hepatitis C survey prompts call for all Canadian boomers to get tested. [http://www.liver.ca/newsroom/press-releases/29-01\\_2013\\_CLF\\_recommends\\_hepC\\_testing.aspx](http://www.liver.ca/newsroom/press-releases/29-01_2013_CLF_recommends_hepC_testing.aspx) (Accessed 27/1/2014).
12. Leddin DJ, Enns R, Hilsden R, Plourde V, Rabeneck L, Sadowski DC, et al. Canadian Association of Gastroenterology position statement on screening individuals at average risk for developing colorectal cancer: 2010. *Can J Gastroenterol*. 2010 Dec;24(12):705-14.
13. Hilsden RJ, Rostom A, Dube C, Pontifex D, McGregor SE, Bridges RJ. Development and implementation of a comprehensive quality assurance program at a community endoscopy facility. *Can J Gastroenterol*. 2011 Oct;25(10):547-54.

1  
2  
3  
4  
5  
6  
7  
8  
9  
10  
11  
12  
13  
14  
15  
16  
17  
18  
19  
20  
21  
22  
23  
24  
25  
26  
27  
28  
29  
30  
31  
32  
33  
34  
35  
36  
37  
38  
39  
40  
41  
42  
43  
44  
45  
46  
47  
48  
49  
50  
51  
52  
53  
54  
55  
56  
57  
58  
59  
60

14. Shah HA, Heathcote J, Feld JJ. A Canadian screening program for hepatitis C: is now the time? *CMAJ*. 2013 Oct 15;185(15):1325-8.
15. Borkhoff CM, Saskin R, Rabeneck L, Baxter NN, Liu Y, Tinmouth J, et al. Disparities in receipt of screening tests for cancer, diabetes and high cholesterol in Ontario, Canada: a population-based study using area-based methods. *Can J Public Health*. 2013 Jul-Aug;104(4):e284-90.
16. Khadilkar A, Chen Y. Rate of cervical cancer screening associated with immigration status and number of years since immigration in Ontario, Canada. *J Immigr Minor Health*. 2013 Apr;15(2):244-8.
17. Li D, Tang T, Patterson M, Ho M, Heathcote J, Shah H. The impact of hepatitis B knowledge and stigma on screening in Canadian Chinese persons. *Can J Gastroenterol*. 2012 Sep;26(9):597-602.
18. Shivkumar S, Peeling R, Jafari Y, Joseph L, Pant Pai N. Accuracy of rapid and point-of-care screening tests for hepatitis C: a systematic review and meta-analysis. *Ann Intern Med*. 2012 Oct 16;157(8):558-66.
19. Wong VW, Wong GL, Chim AM, Cheng TF, Cheung SW, Lai CM, et al. Targeted hepatitis C screening among ex-injection drug users in the community. *J Gastroenterol Hepatol*. 2014 Jan;29(1):116-20.
20. Kraijden M, Cook D, Buller-Taylor T, et al. Cost implications of one-time HCV screening of the 1945 to 1965 birth cohort in British Columbia, Canada. *J Hepatol* 2013;58 (suppl; Abstract 467).

Confidential

## TABLES

**Table 1: Characteristics of Patients Referred for Colorectal Cancer Screening According to Willingness to Undergo HCV Screening**

| Variable †                   | Total Cohort<br>(n=1,012) | Willing to be Screened<br>(n=903) * | Unwilling to be Screened<br>(n=100) * | Unadjusted Odds Ratio for<br>Willingness to be Screened<br>(95% CI) * |
|------------------------------|---------------------------|-------------------------------------|---------------------------------------|-----------------------------------------------------------------------|
| Male                         | 52% (529)                 | 52% (474)                           | 51% (51)                              | 1.09 (0.74-1.59)                                                      |
| Age, years                   | 56 (53-62)                | 56 (53-62)                          | 57 (53-61)                            | 0.99 (0.96-1.02)                                                      |
| Baby boomer (born 1945-1965) | 90% (914)                 | 90% (814)                           | 91% (91)                              | 0.81 (0.38-1.73)                                                      |
| Caucasian race               | 87% (876)                 | 89% (803)                           | 66% (65)                              | <b>4.25 (2.66-6.79)</b>                                               |
| Immigrant                    | 22% (221)                 | 20% (177)                           | 42% (42)                              | <b>0.34 (0.22-0.52)</b>                                               |
| University education         | 42% (399)                 | 40% (358)                           | 38% (38)                              | 0.94 (0.60-1.47)                                                      |
| Married or common-law        | 82% (831)                 | 82% (741)                           | 83% (83)                              | 0.90 (0.52-1.59)                                                      |
| HCV risk factors             |                           |                                     |                                       |                                                                       |
| 0                            | 74% (746)                 | 72% (653)                           | 89% (89)                              | Ref                                                                   |
| 1                            | 17% (169)                 | 18% (158)                           | 8% (8)                                | <b>2.69 (1.28-5.66)</b>                                               |
| ≥2                           | 10% (97)                  | 10% (92)                            | 3% (3)                                | <b>4.18 (1.30-13.5)</b>                                               |

Data are median (IQR) or proportions (% [n]).

\* Excludes 9 patients with a self-reported diagnosis of HCV.

† Gender, age, race, immigrant status, marital status, and education level missing in 1, 2, 6, 1, 5, and 69 respondents, respectively.
